# Supplementary material for: Global Changes in Gene Expression and Splicing in Alcoholic Liver Disease
Source: Research Square preprint supplement (doi:10.21203/rs.3.rs-7380649/v1), 2025-09-26
Supplement: Supplementary file 3 [file 5d9c76029ab3ec5a73eb6d41.xlsx]

## Sheet: Sheet1
Supplementary Table S7
26 genes from GSEA “Gluconeogenesis” pathway affected in the liver of patients with various stages of alcohol-induced liver damage
	Transcript	eASH	nsAH	sAH	exAH
	ALDOA		x	x	x
	ALDOB	x	x	x	x
	ALDOC		x	x	x
	ENO1			x
	ENO2			x	x
	ENO3		x	x	x
	FBP1	x	x	x
	FBP2
	GAPDH
	GAPDHS
	GOT1	x		x	x
	GOT2	x	x	x	x
	GPI		x	x
	LOC642969
	LOC730418
	MDH1
	MDH2				x
	PC	x	x	x	x
	PCK1		x	x	x
	PCK2		x	x	x
	PFKFB1	x	x	x	x
	PGAM1
	PGAM2		x	x	x
	PGK1
	PRKACA	x	x	x	x
	PRKACB		x
		7	14	16	14
