# Supplementary material for: Global Changes in Gene Expression and Splicing in Alcoholic Liver Disease
Source: Research Square preprint supplement (doi:10.21203/rs.3.rs-7380649/v1), 2025-09-26
Supplement: Supplementary file 7 [file 9085f79c702672ea08f53f29.docx]

­
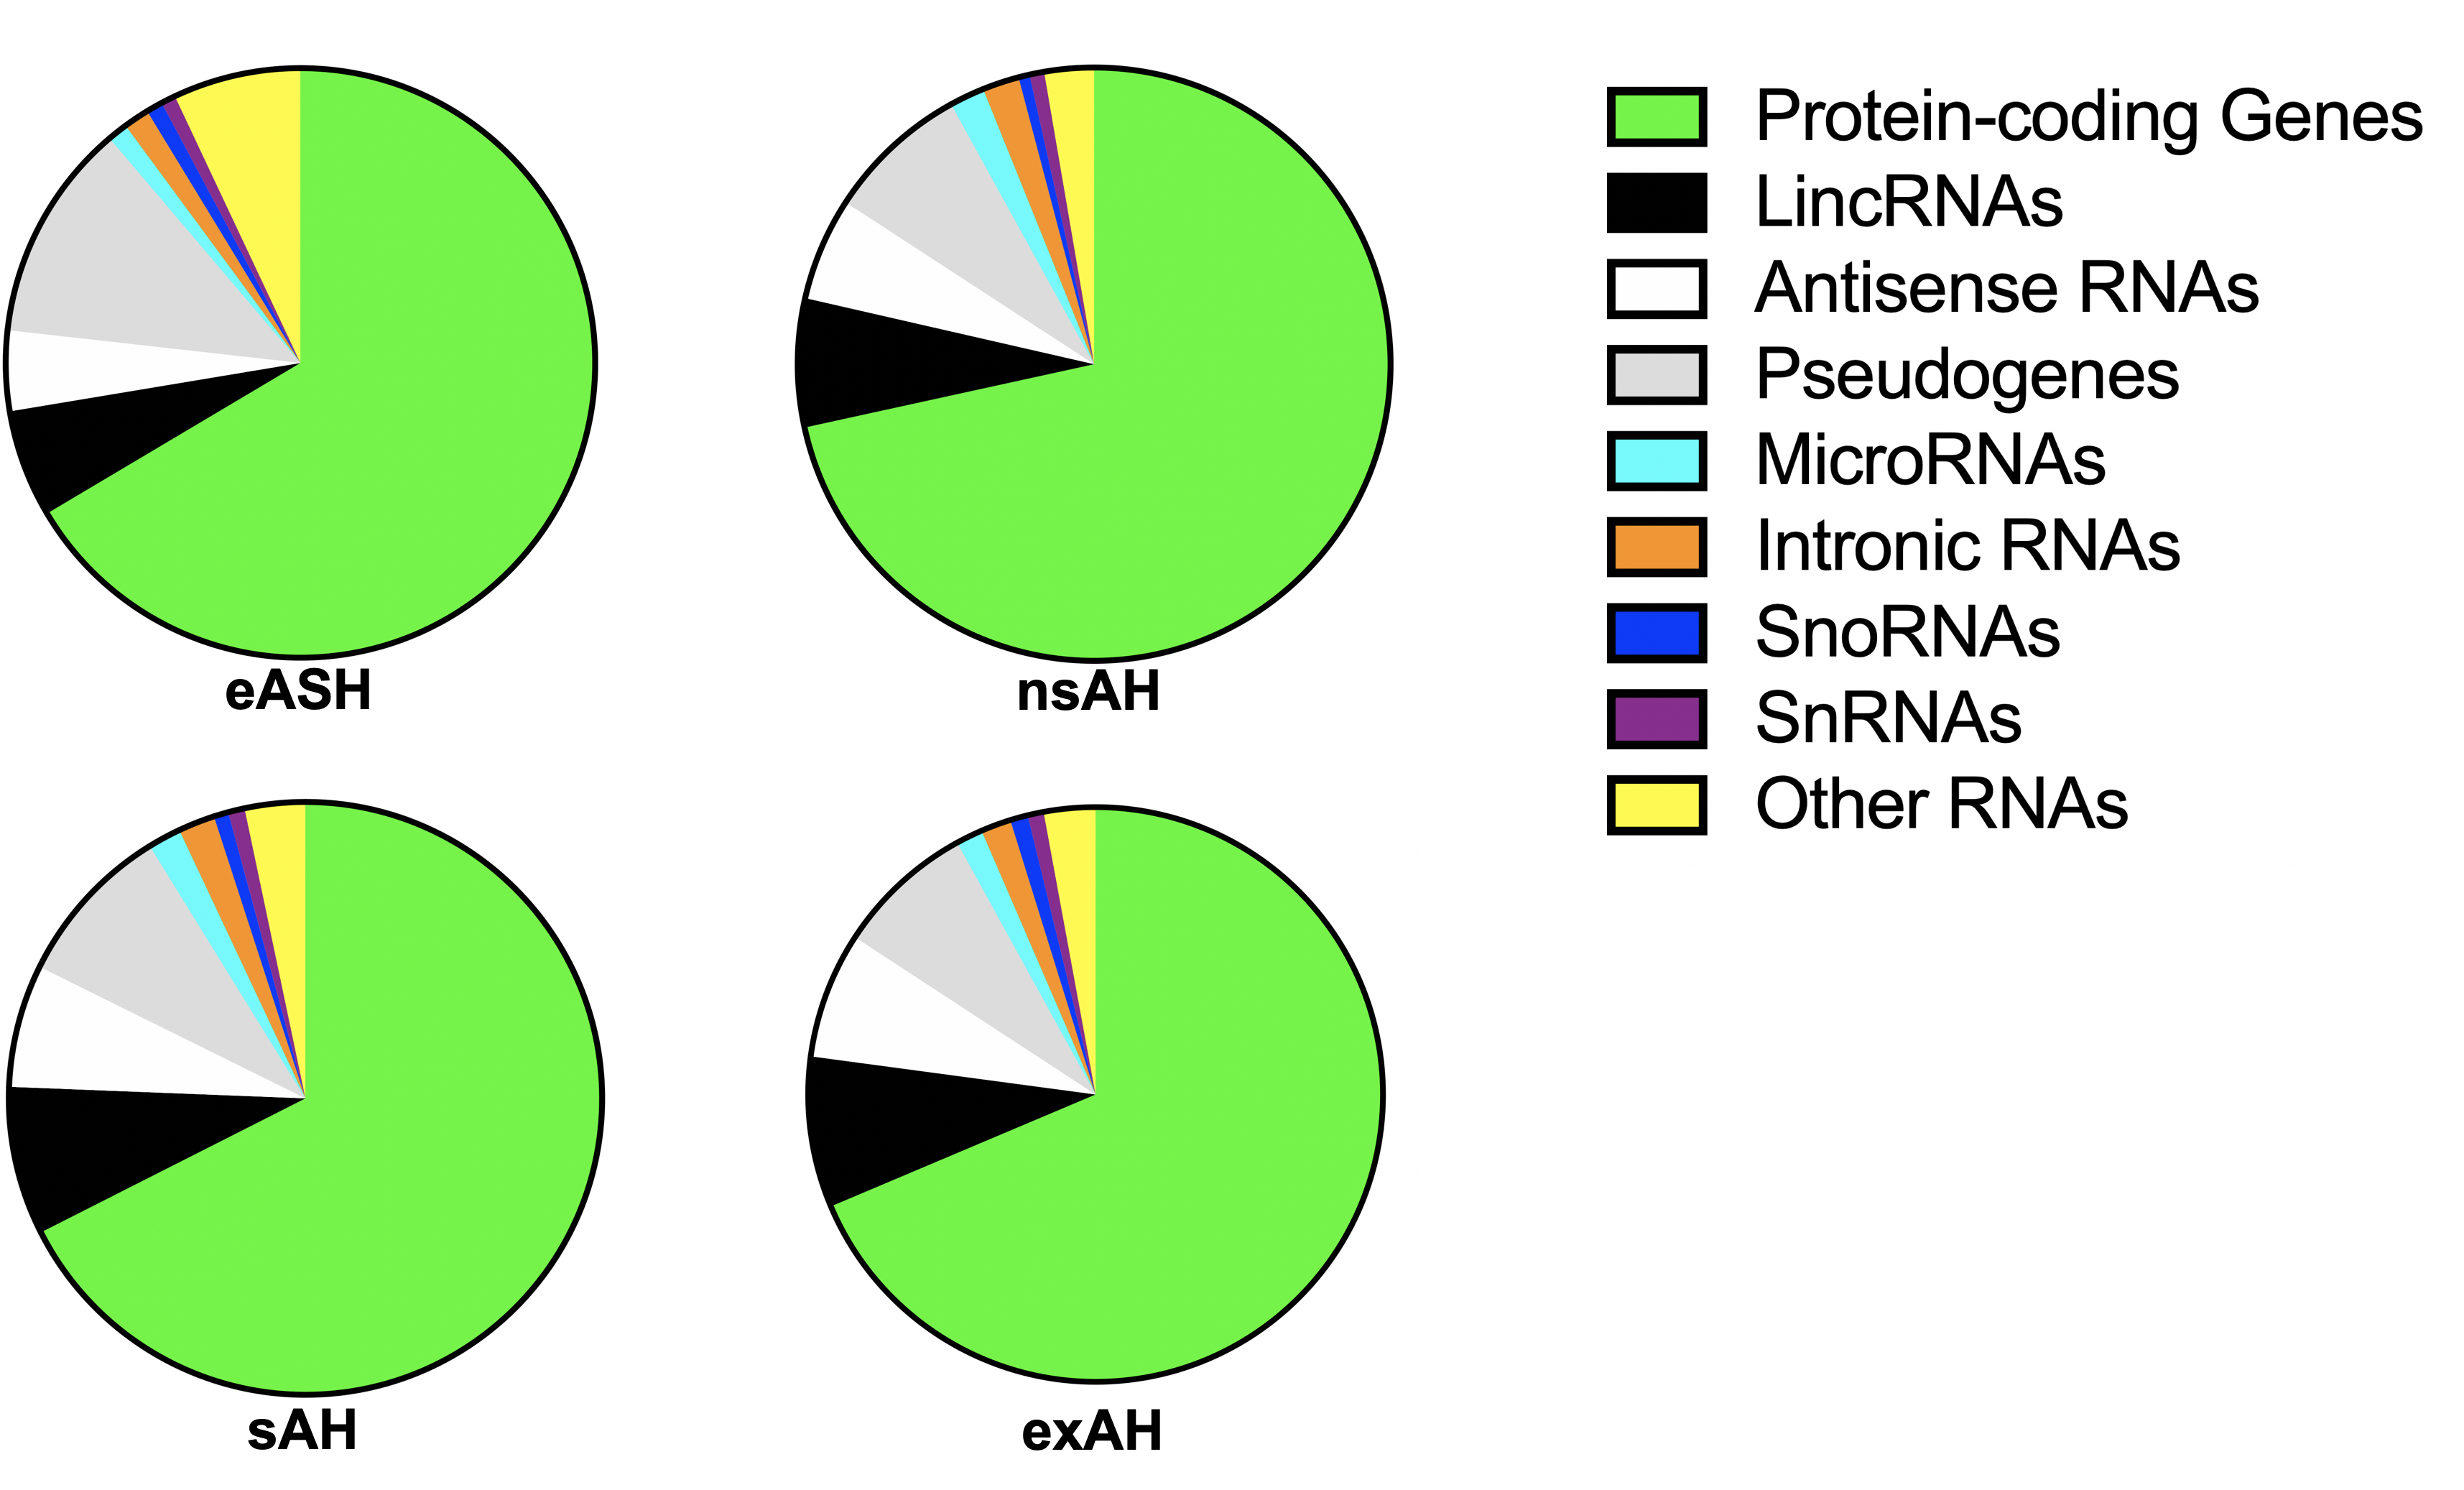


**Supplementary Figure S1.** Distribution of altered transcripts in alcoholic liver disease. eASH – early alcoholic steatohepatitis, nsAH – non-severe alcoholic hepatitis, sAH – severe alcoholic hepatitis, exAH – explants from patients who underwent hepatic transplantation due to liver failure.

**Supplementary Figure S2.** Blood alcohol concentrations in rats exposed to alcohol vapor (N=12 in each group). * – P < 0.05.

**
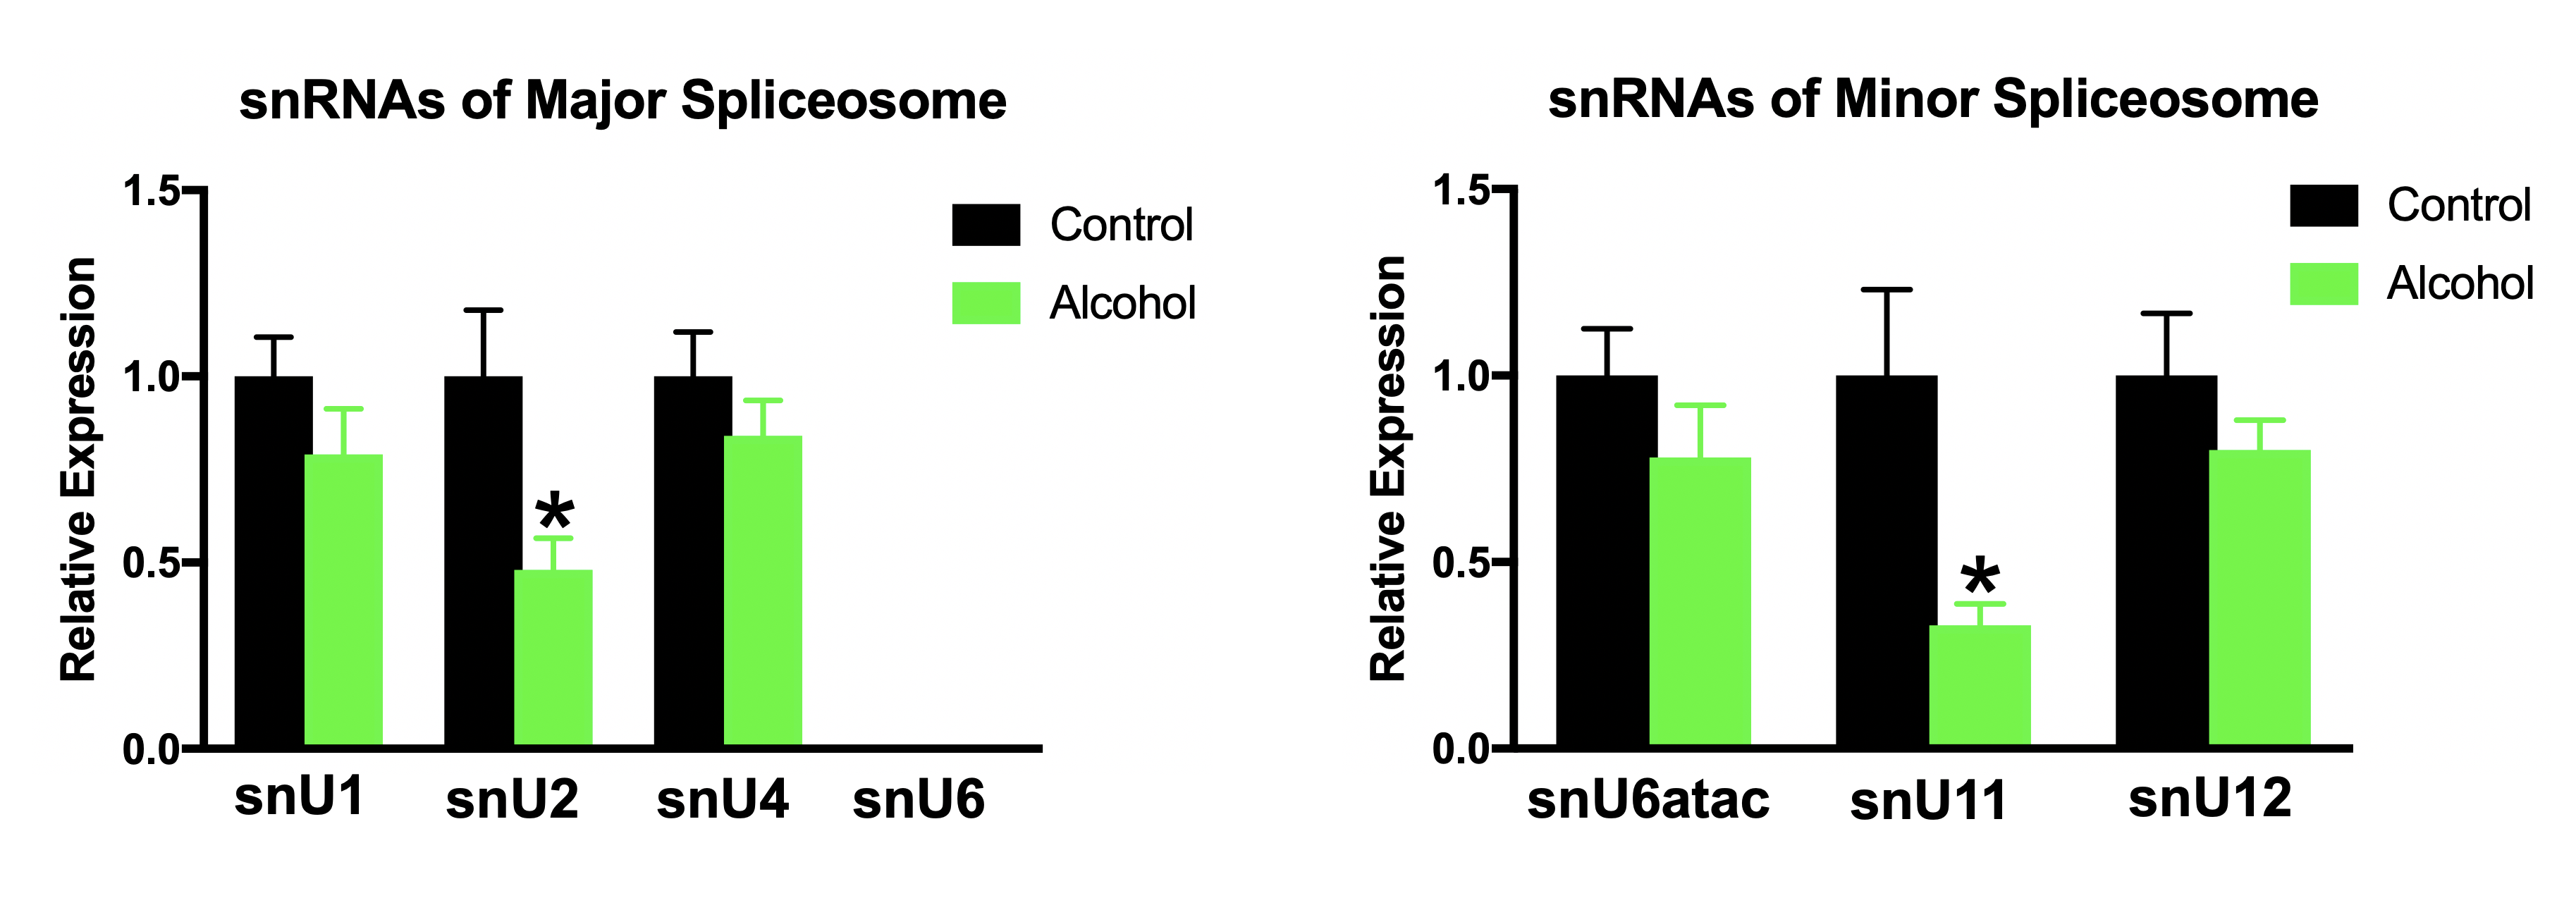
**

**Supplementary Figure S3.** Expression of snRNAs in the lung of rats exposed to alcohol vapor. * – P < 0.05.


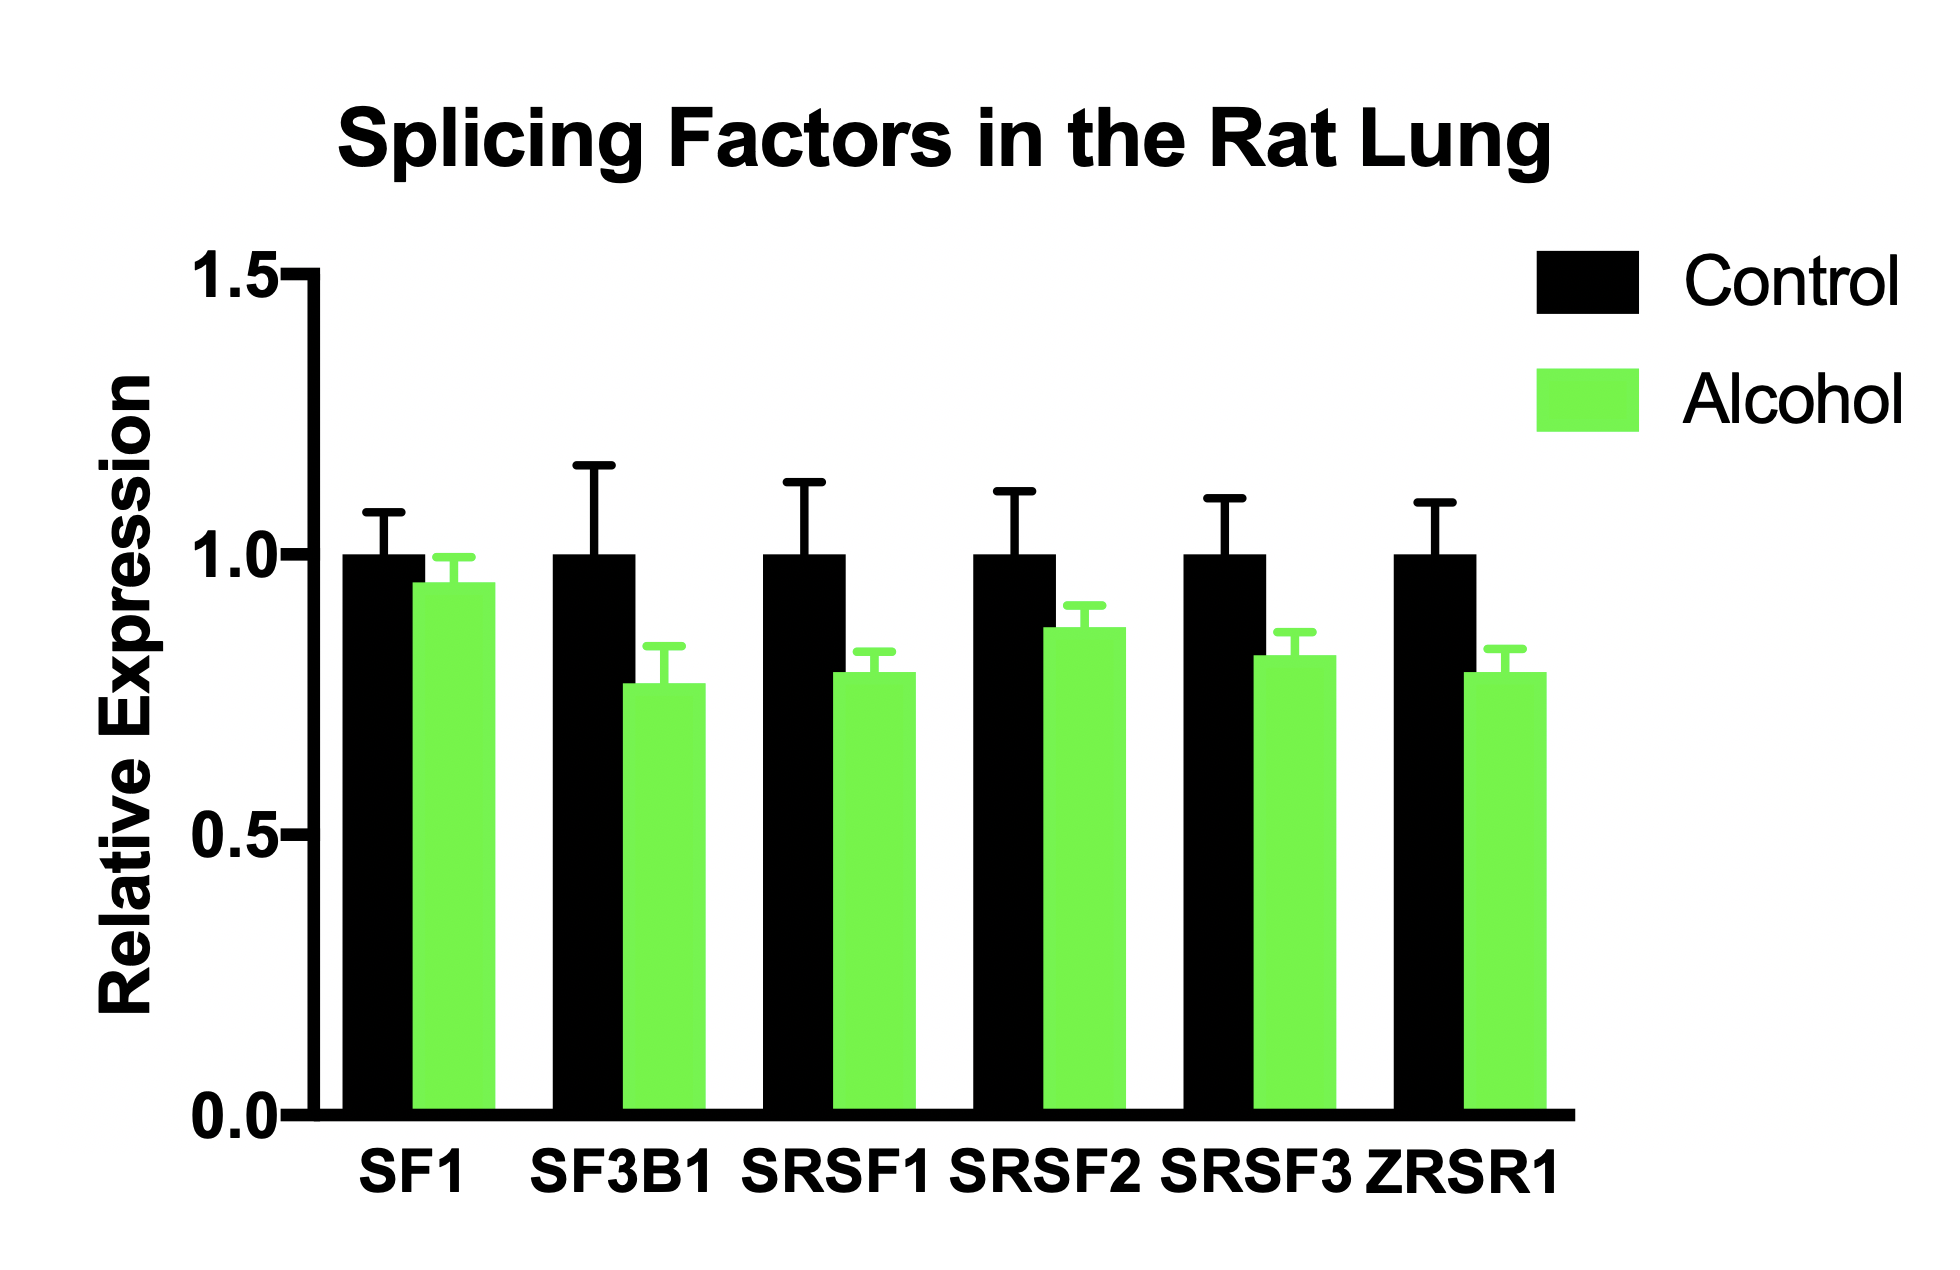


**Supplementary Figure S4.** Expression of cancer-related splicing-factors in the lung of rats.

**
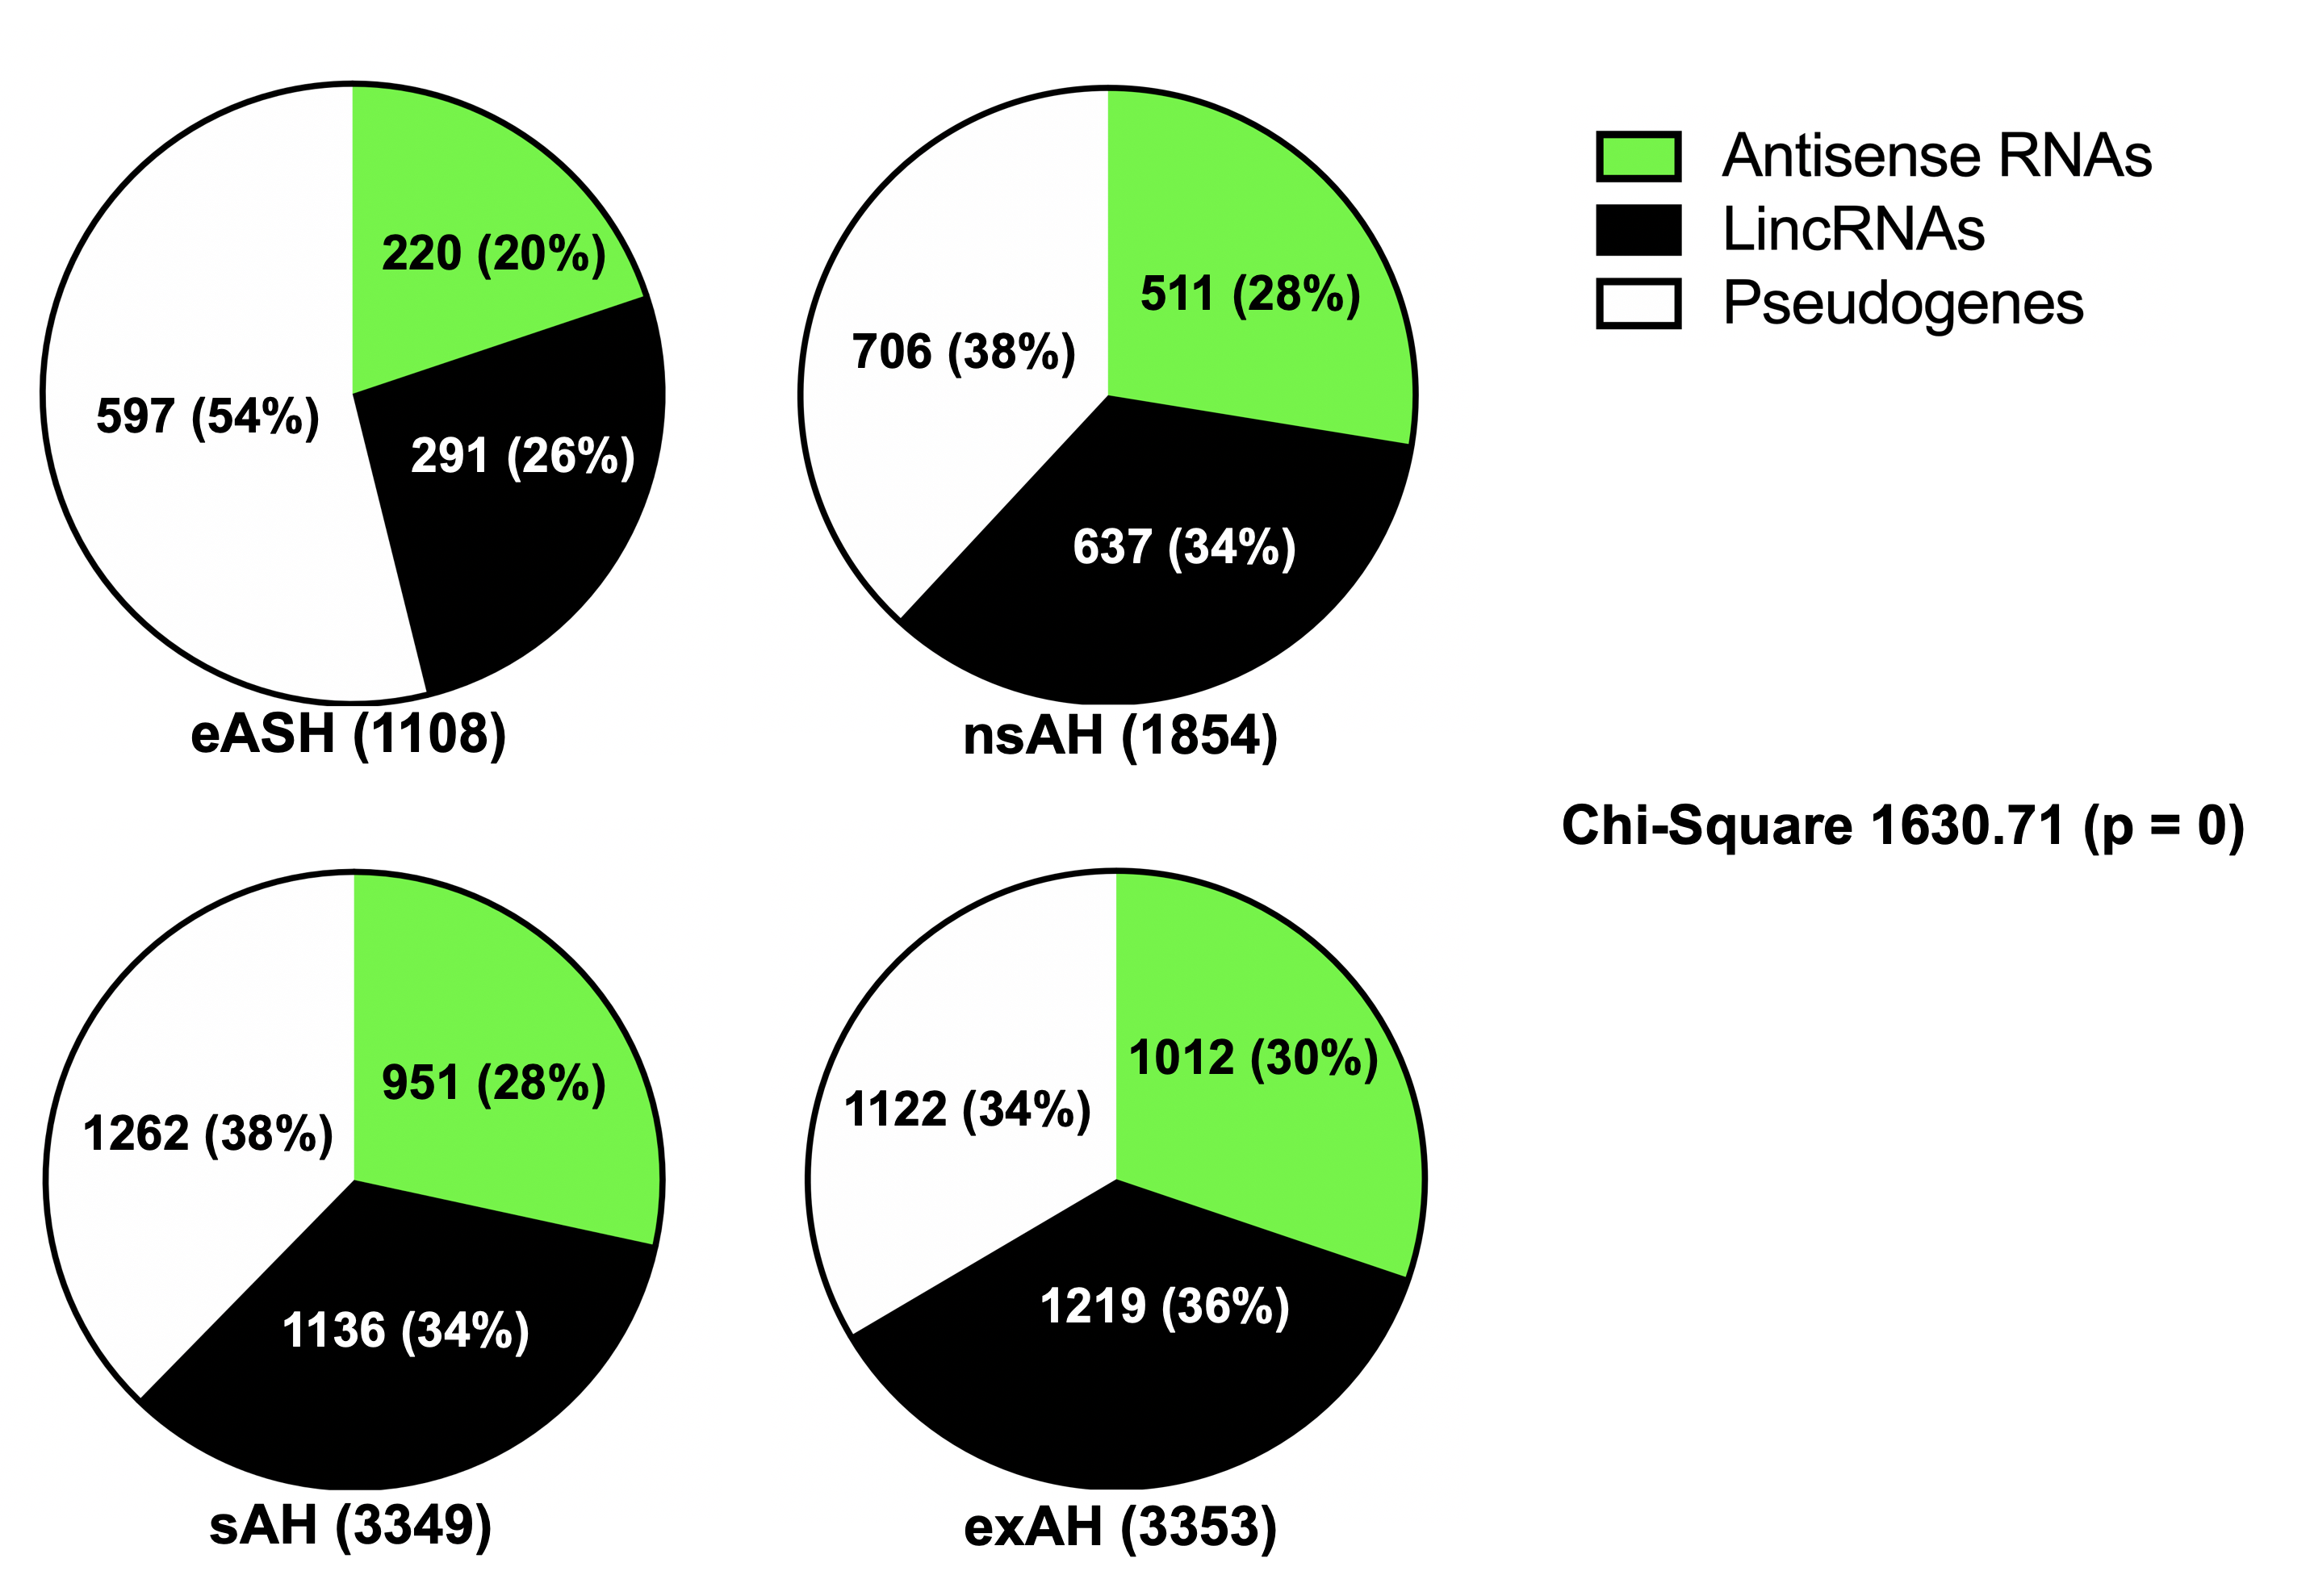
**

**Supplementary Figure S5.** Distribution of altered hepatic lncRNAomes in alcoholic liver disease. eASH – early alcoholic steatohepatitis, nsAH – non-severe alcoholic hepatitis, sAH – severe alcoholic hepatitis, exAH – explants from patients who underwent hepatic transplantation due to liver failure. LincRNAs – long intergenic non-coding RNAs. Difference in proportion of affected lncRNAs between groups was calculated using chi-square test.

**
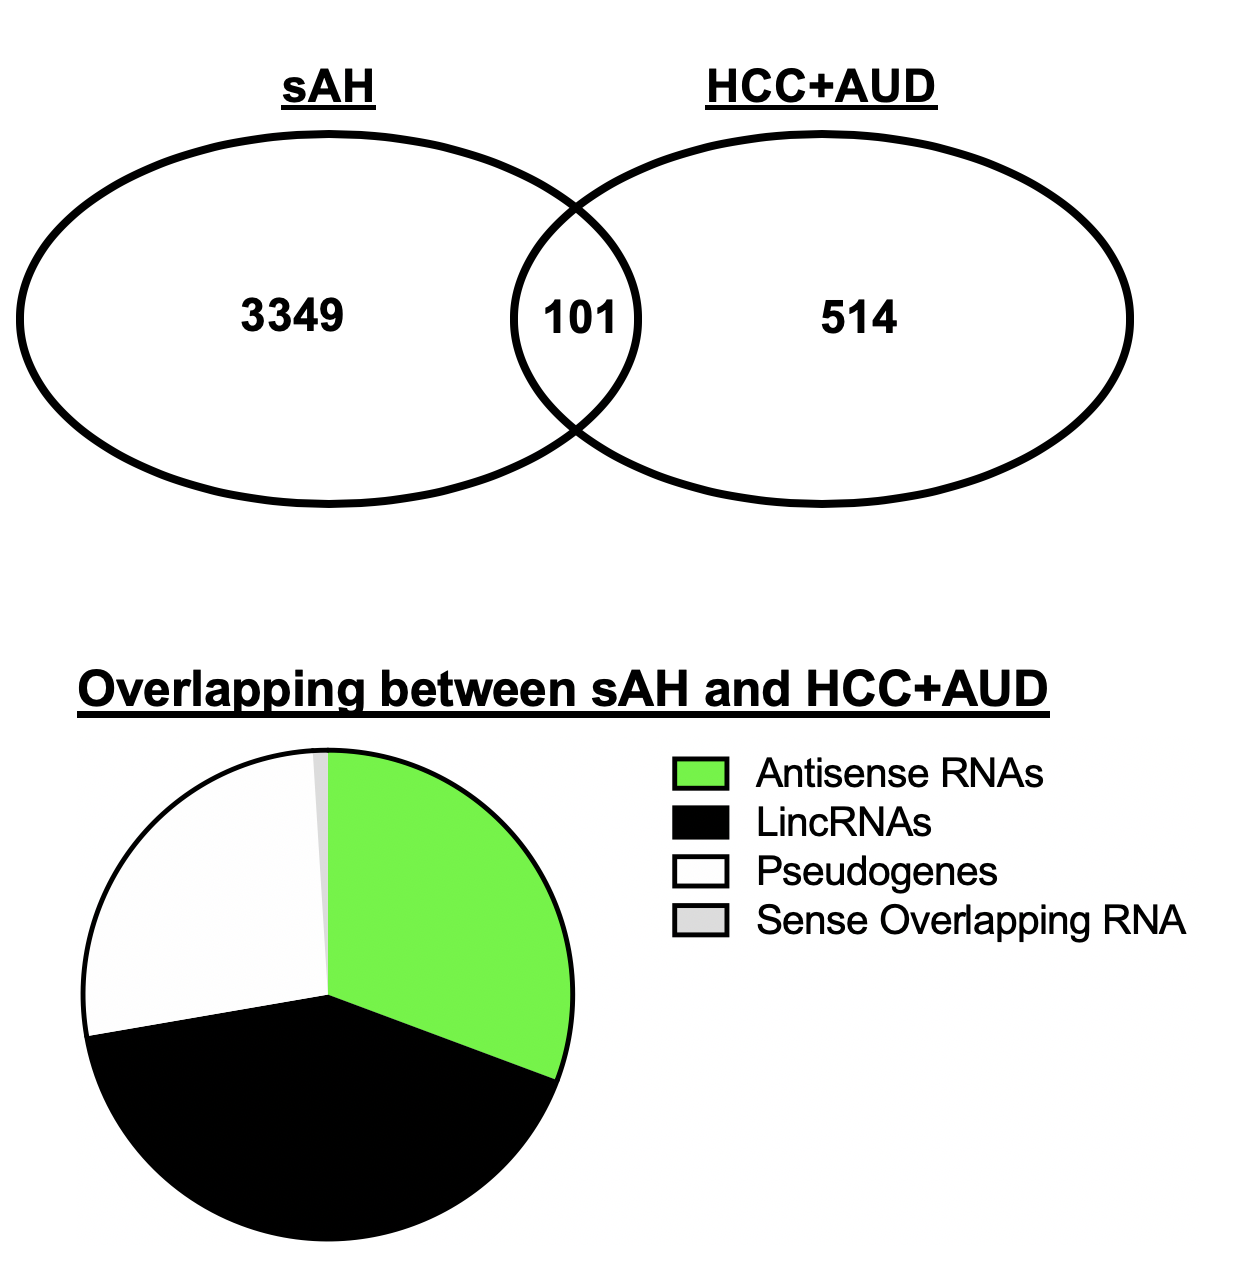
**

**Supplementary Figure S6.** LncRNAs overlapping in severe alcoholic hepatitis (sAH) and hepatocellular carcinoma in patients with alcohol use disorder (HCC+AUD). LincRNAs – long intergenic non-coding RNAs.

**
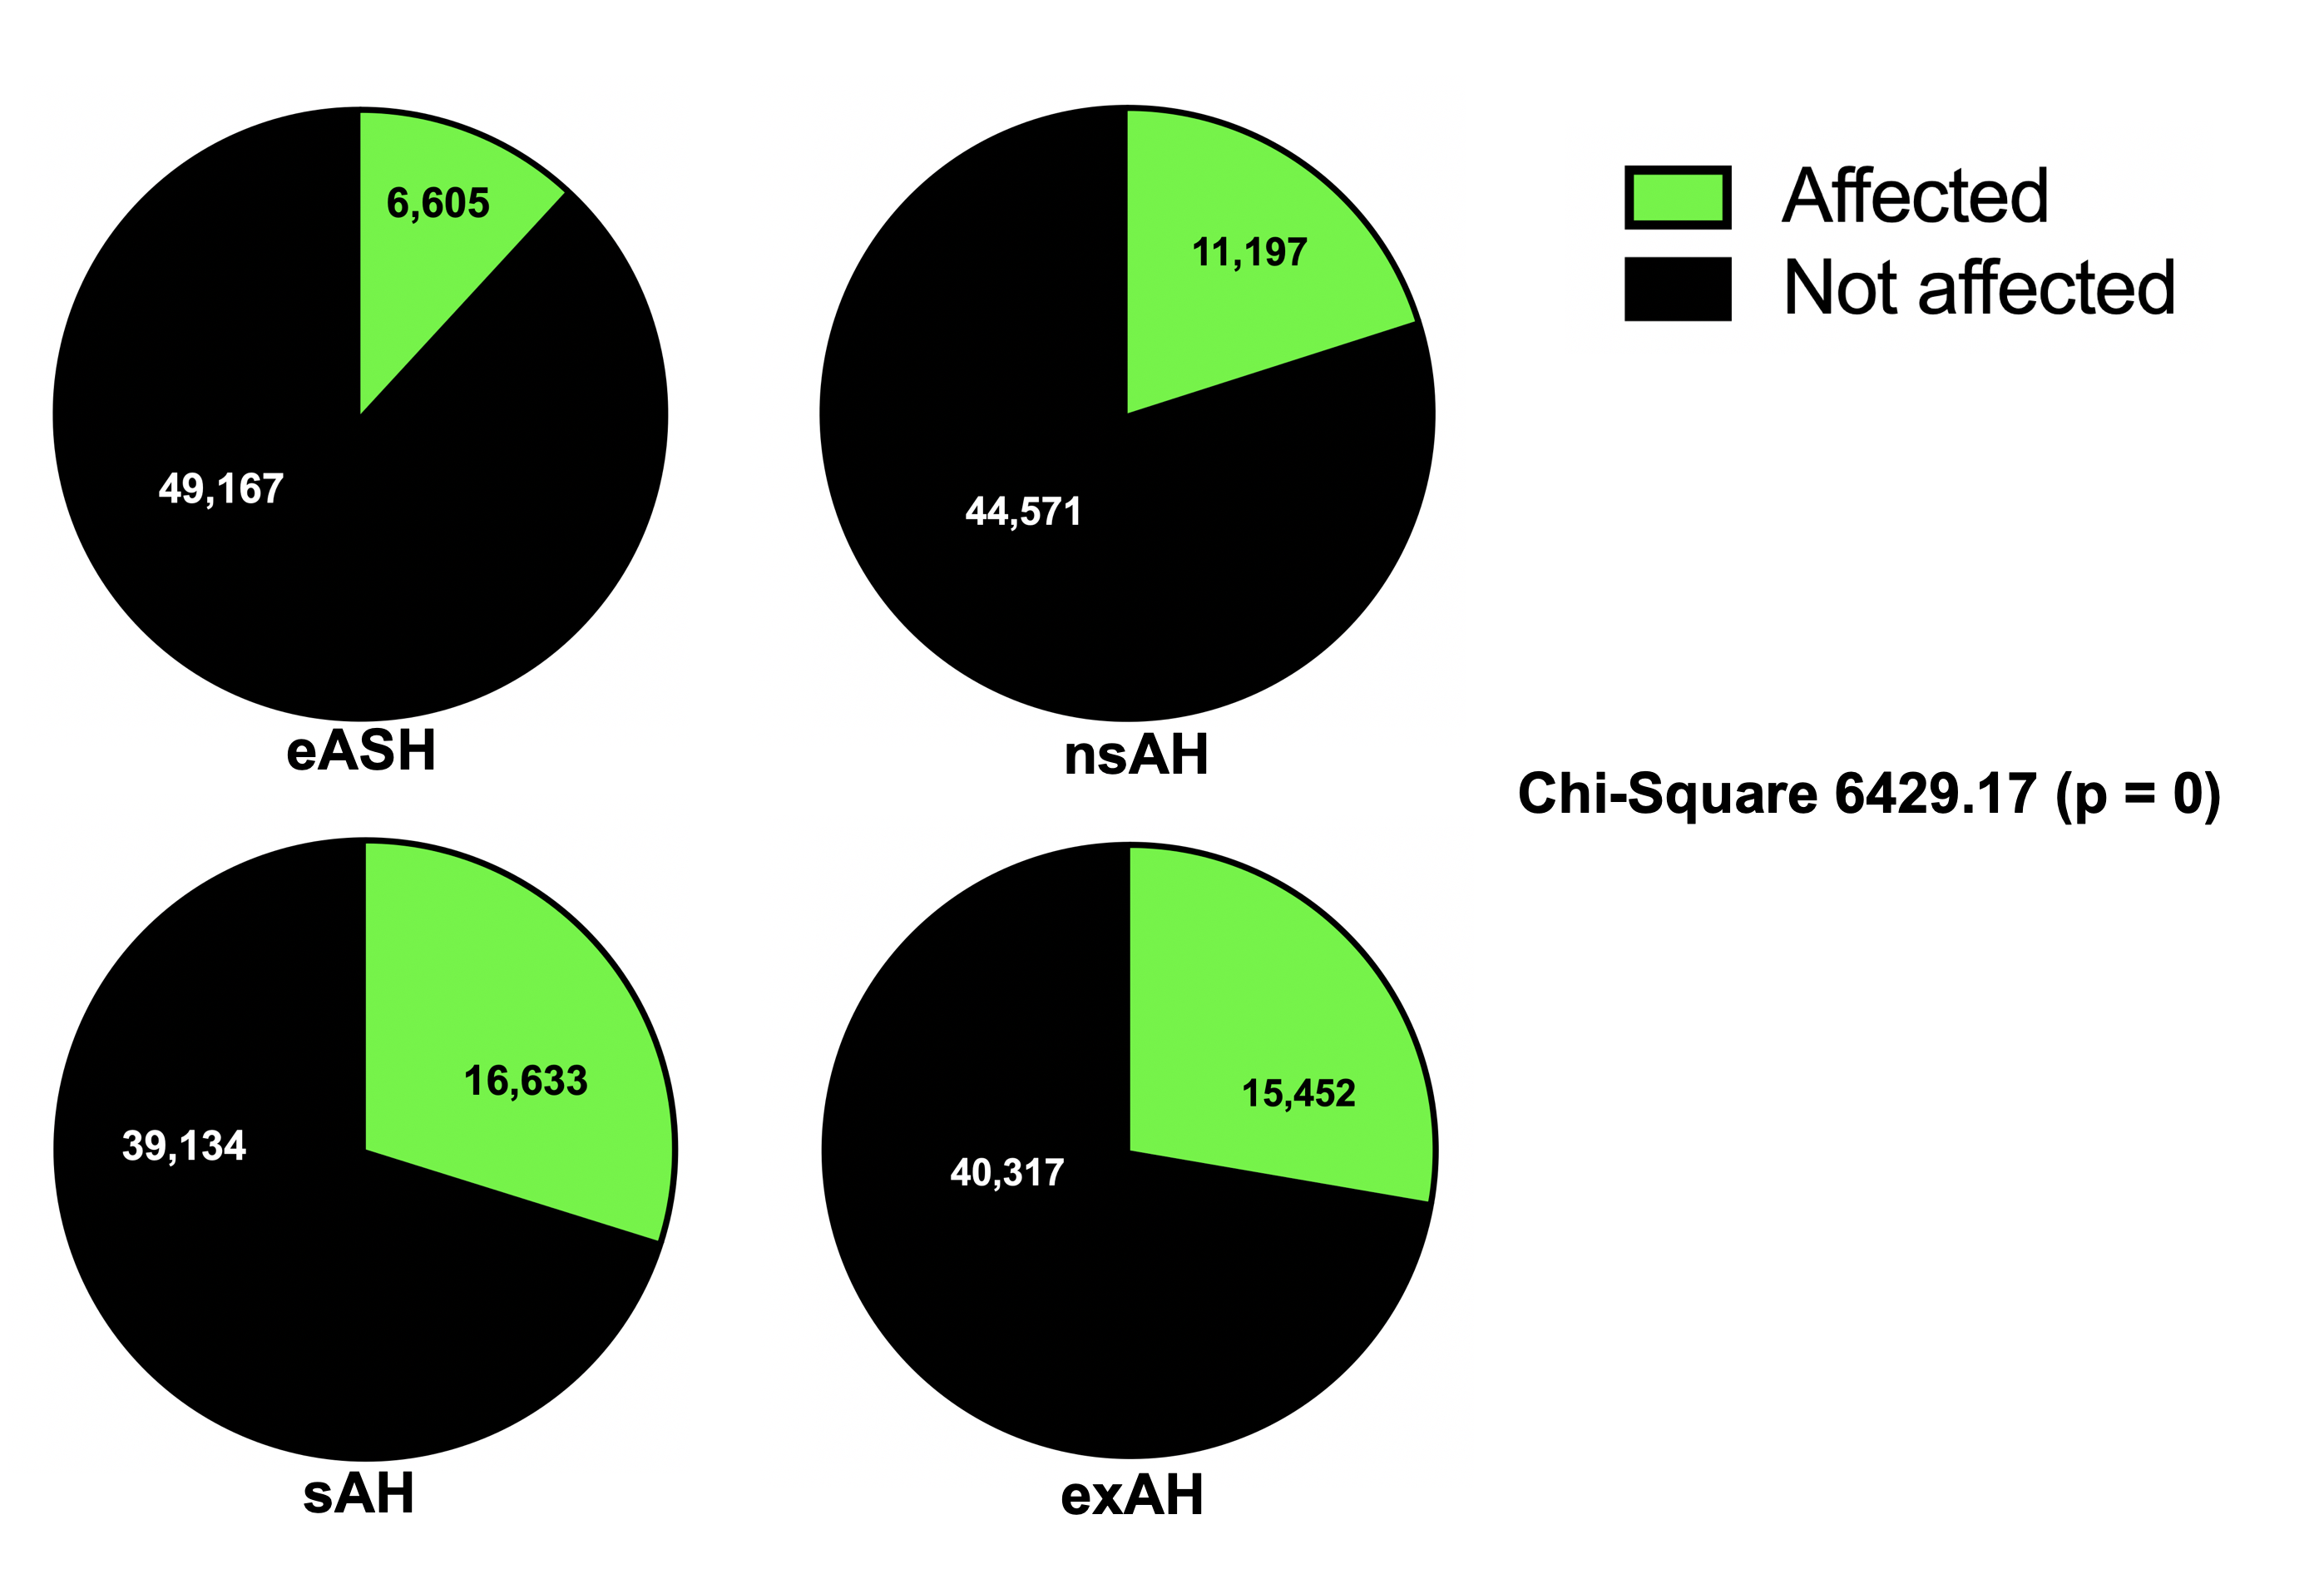
**

**Supplementary Figure S7.** Differentially expressed and misspliced genes in alcoholic liver disease. eASH – early alcoholic steatohepatitis, nsAH – non-severe alcoholic hepatitis, sAH – severe alcoholic hepatitis, exAH – explants from patients who underwent hepatic transplantation due to liver failure. Difference in proportion of affected genes between groups was calculated using chi-square test.


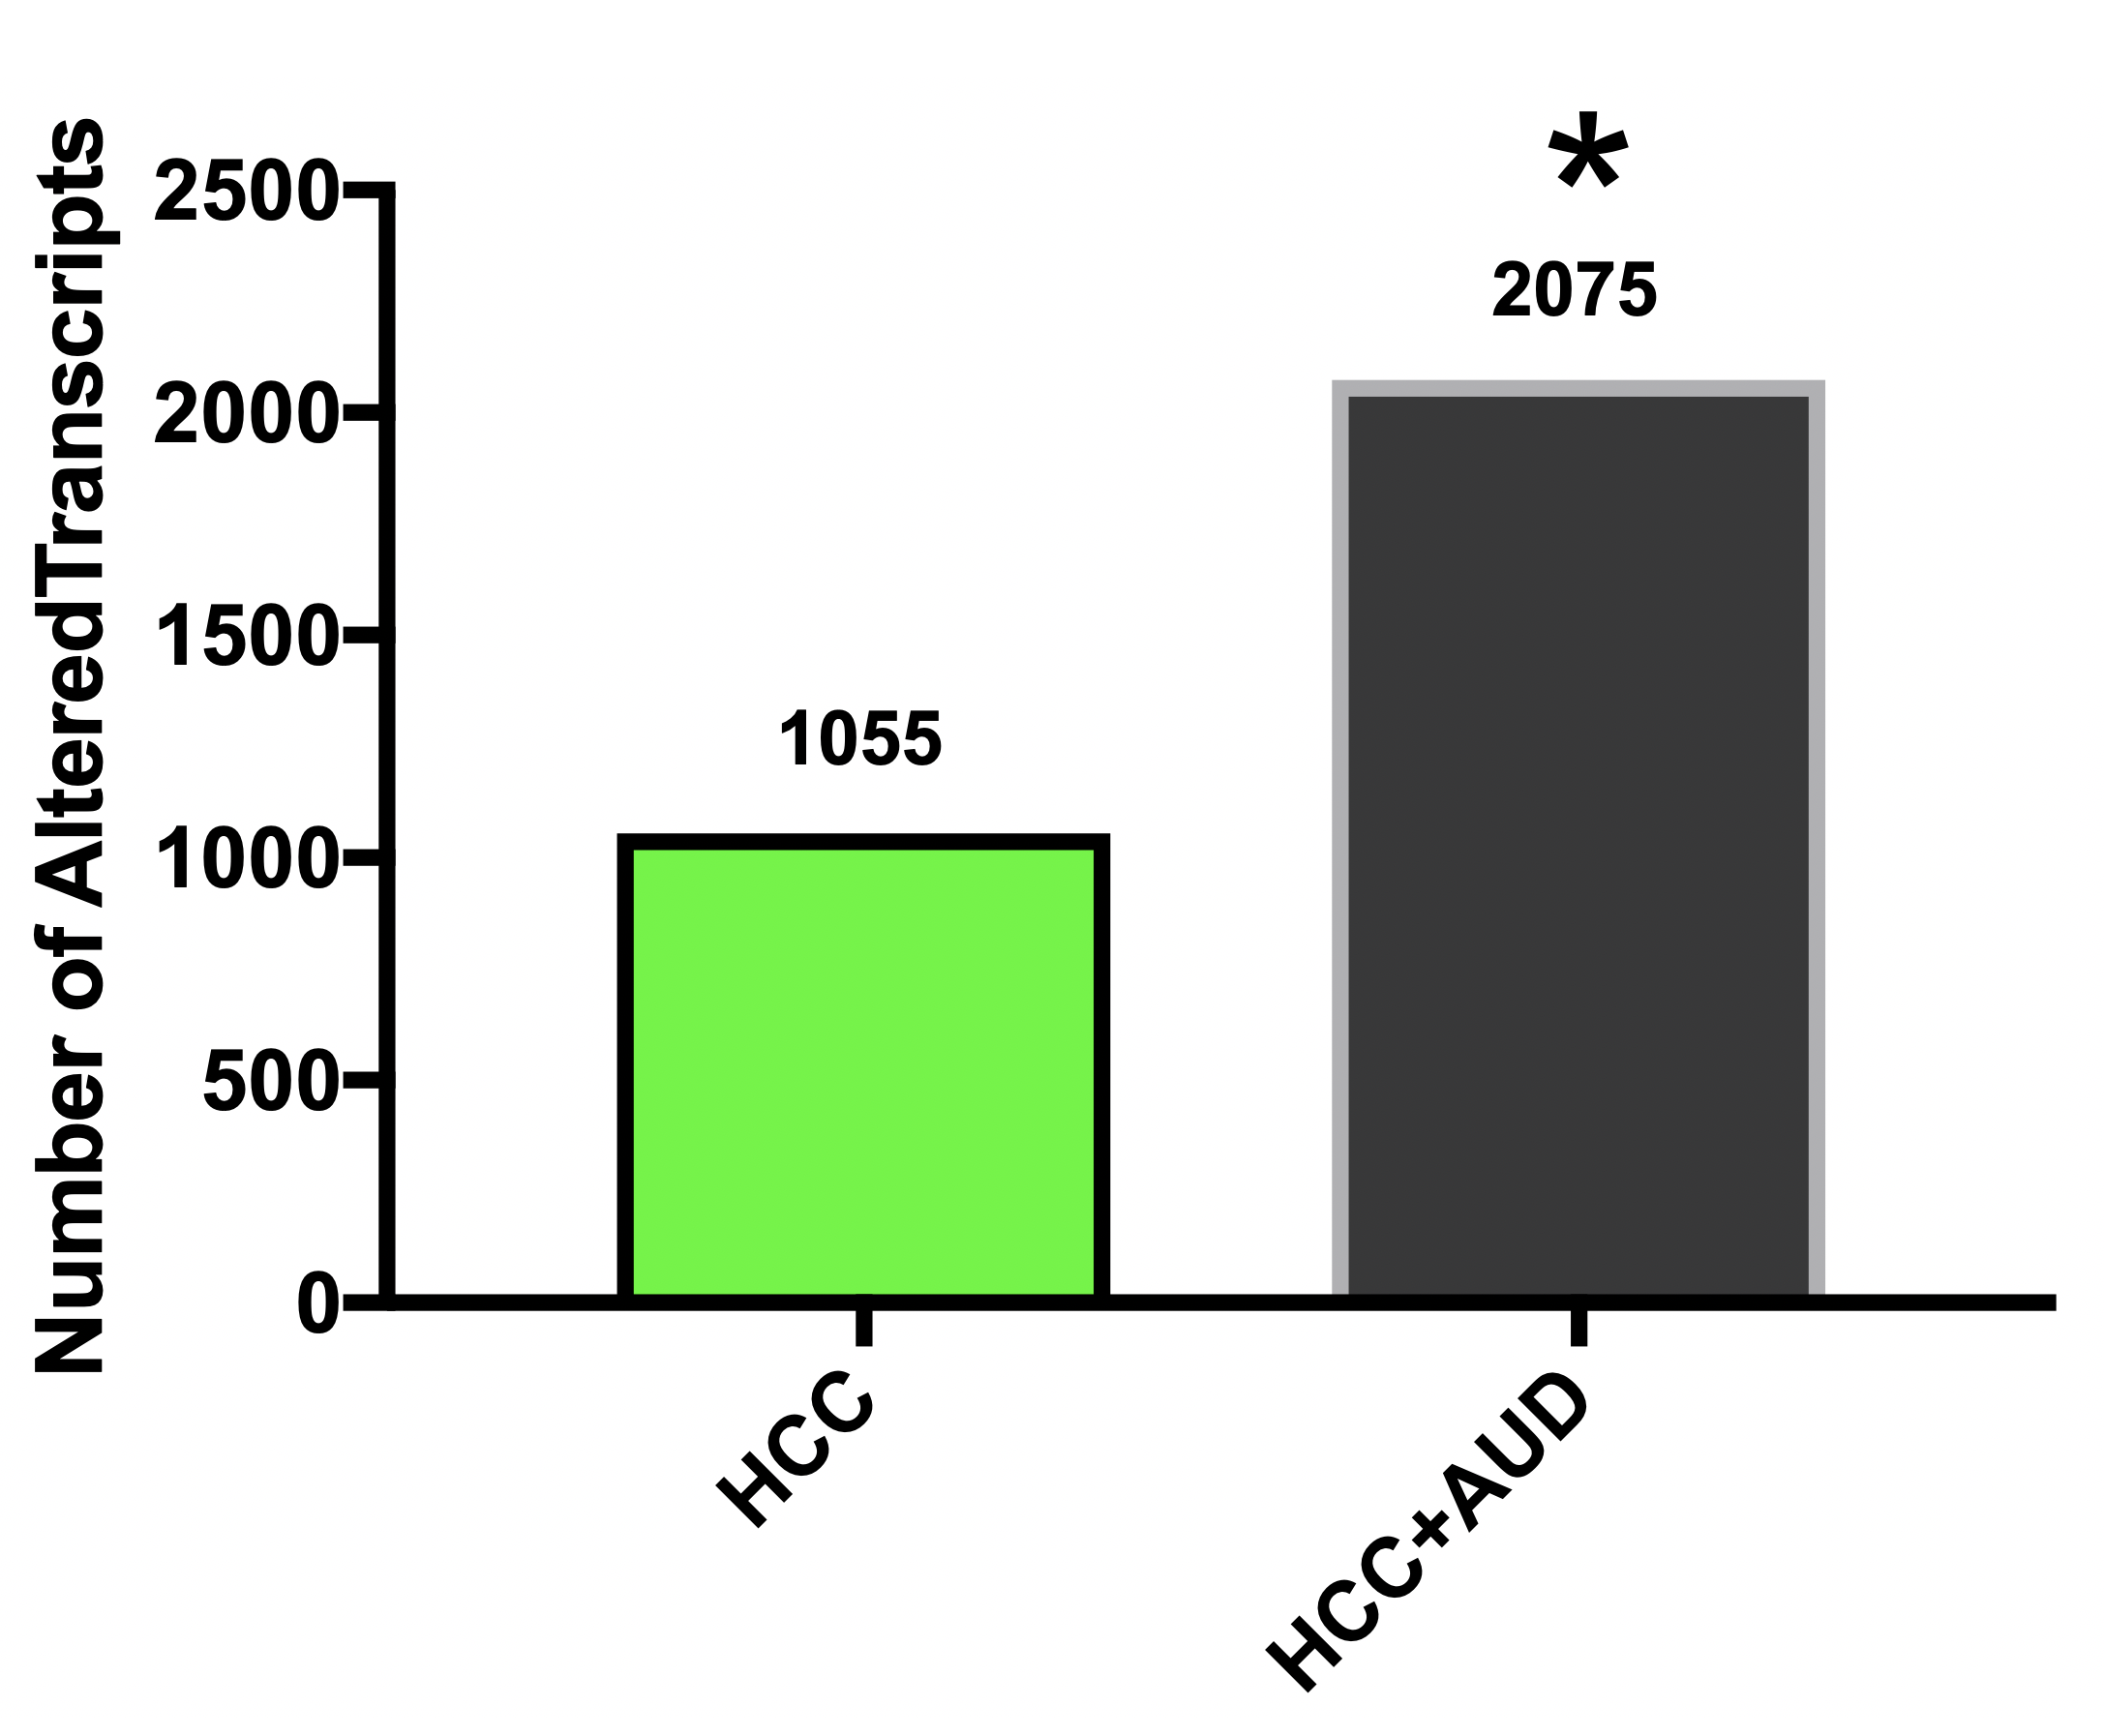


**Supplementary Figure S8.** Gene expression in hepatocellular carcinoma in patients with and without alcohol use disorder. HCC – hepatocellular carcinoma, AUD – alcohol use disorder. Difference in proportion of affected transcripts between groups was calculated using chi-square test.
