# Supplementary material for: Global Changes in Gene Expression and Splicing in Alcoholic Liver Disease
Source: Research Square preprint supplement (doi:10.21203/rs.3.rs-7380649/v1), 2025-09-26
Supplement: Supplementary file 9 [file eb5c9f4b678df90f8cc98248.xlsx]

## Sheet: Sheet1
Supplementary Table S1
Gene Ontology of Overlapping Downregulated Transcriptome in eASH and sAH
	GO biological process	Fold Enrichment	P-value
	DNA replication initiation (GO:0006270)	7.81	0.0343
	DNA damage response, signal transduction by p53 class mediator resulting in cell cycle arrest (GO:0006977)	5.82	0.00137
	Regulation of mitotic metaphase/anaphase transition (GO:0030071)	5.75	0.00376
	Positive regulation of mitotic cell cycle phase transition (GO:1901992)	4.84	0.00522
	Mitotic spindle organization (GO:0007052)	4.72	0.0072
